# Supplementary material for: Oxidation of olefins using atmospheric oxygen atoms initiated by tert-butylhydroperoxide or hydrogen peroxide with silver nanoparticles deposited on MCM-41 as catalysts
Source: Royal Society of Chemistry journal article supplement (doi:10.1039/c5gc03110a), 2016-01-01
Supplement: c5gc03110a1.pdf [file c5gc03110a1.pdf]

## Supplementary materials

**Figure S1.** TGA curve of freshly prepared Ag<sub>np</sub>-MCM-41 under air at a heating rate of 10 °C/min.

**Figure S2.** Powder X-ray diffraction of recycled Ag<sub>np</sub>-MCM-41 from an H<sub>2</sub>O/<sup>t</sup>BuOH (1:1) solvent mixture containing 3% NaCl and a 1,2-dichloroethane-acetonitrile (10:1) solvent mixtures.

**Figure S3.** Infrared spectra of Ag<sub>np</sub>-MCM-41, recycled Ag<sub>np</sub>-MCM-41 from a 1,2-dichloroethane-acetonitrile (10:1) solvent mixture and recycled Ag<sub>np</sub>-MCM-41 from an H<sub>2</sub>O/<sup>t</sup>BuOH (1:1) solvent mixture containing 3% NaCl.

**Figure S4.** TGA curve of recycled Ag<sub>np</sub>-MCM-41 under air at a heating rate of 10 °C/min.

**Figure S5.** Comparison of Ag<sub>np</sub>-MCM-41 catalyzed (Z)-cyclooctene epoxidation rate for the first 5h of reaction conducted under air and under nitrogen.

**Figure S6.** Comparison of (Z)-cyclooctene epoxidation rates for solutions that were hot filtered and cold filtered to remove solid Ag<sub>np</sub>-MCM-41 after 24h of reaction, to the rate for a solution which was not filtered.

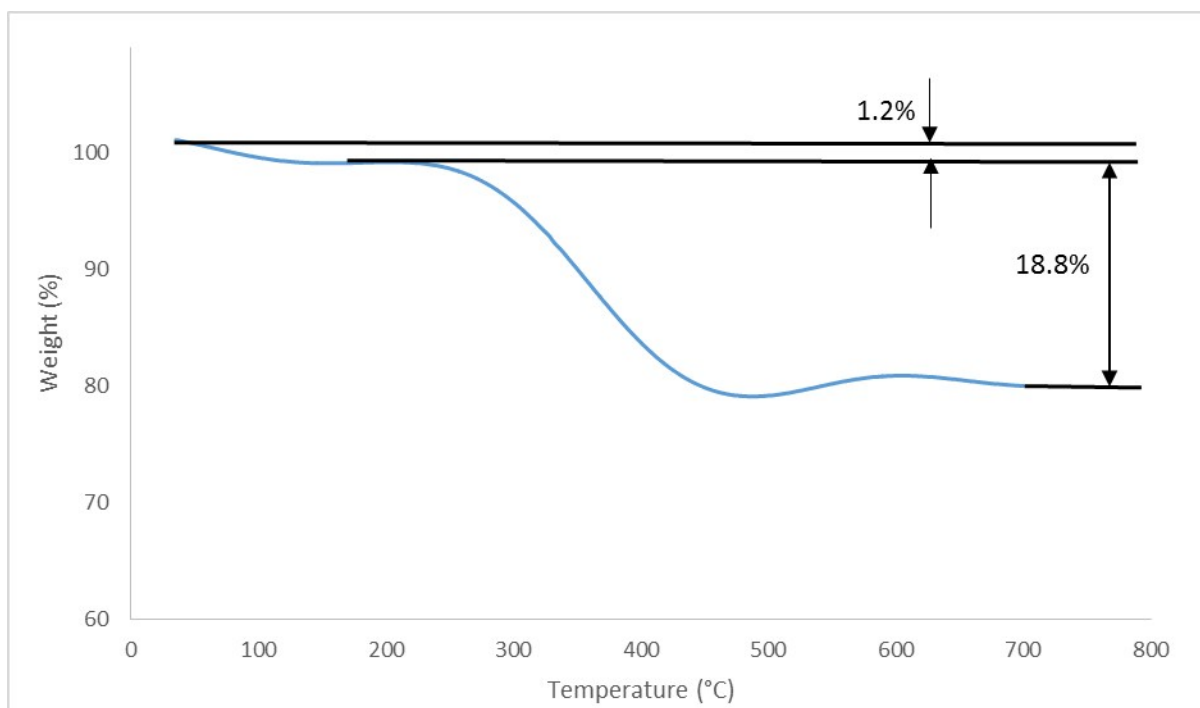

**Figure S1.** TGA curve of freshly prepared Ag<sub>np</sub>-MCM-41 under air at a heating rate of 10 °C/min.

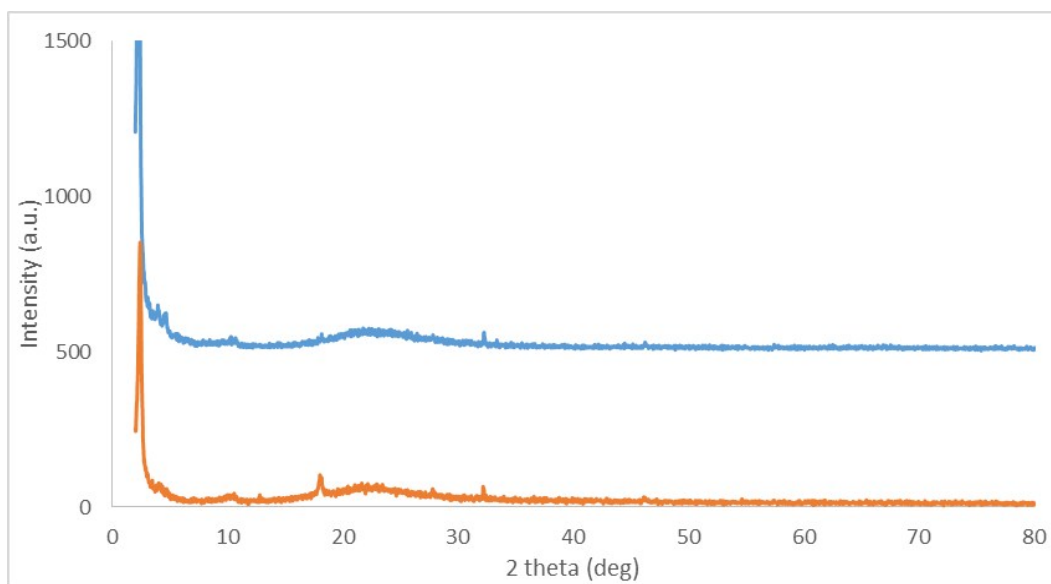

**Figure S2.** Powder X-ray diffraction of recycled Ag<sub>np</sub>-MCM-41 from an H<sub>2</sub>O/<sup>t</sup>BuOH (1:1) solvent mixture containing 3% NaCl (top) and a 1,2-dichloroethane-acetonitrile (10:1) solvent mixtures (bottom).

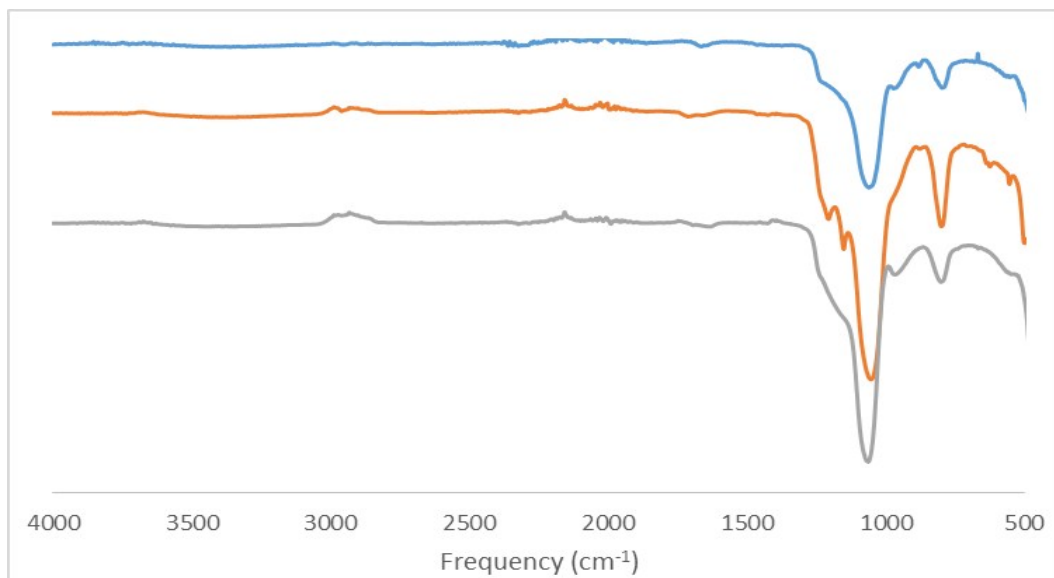

**Figure S3.** Infrared spectra of Ag<sub>np</sub>-MCM-41 (top), recycled Ag<sub>np</sub>-MCM-41 from a 1,2-dichloroethane-acetonitrile (10:1) solvent mixture (middle) and recycled Ag<sub>np</sub>-MCM-41 from an H<sub>2</sub>O/<sup>t</sup>BuOH (1:1) solvent mixture containing 3% NaCl (bottom).

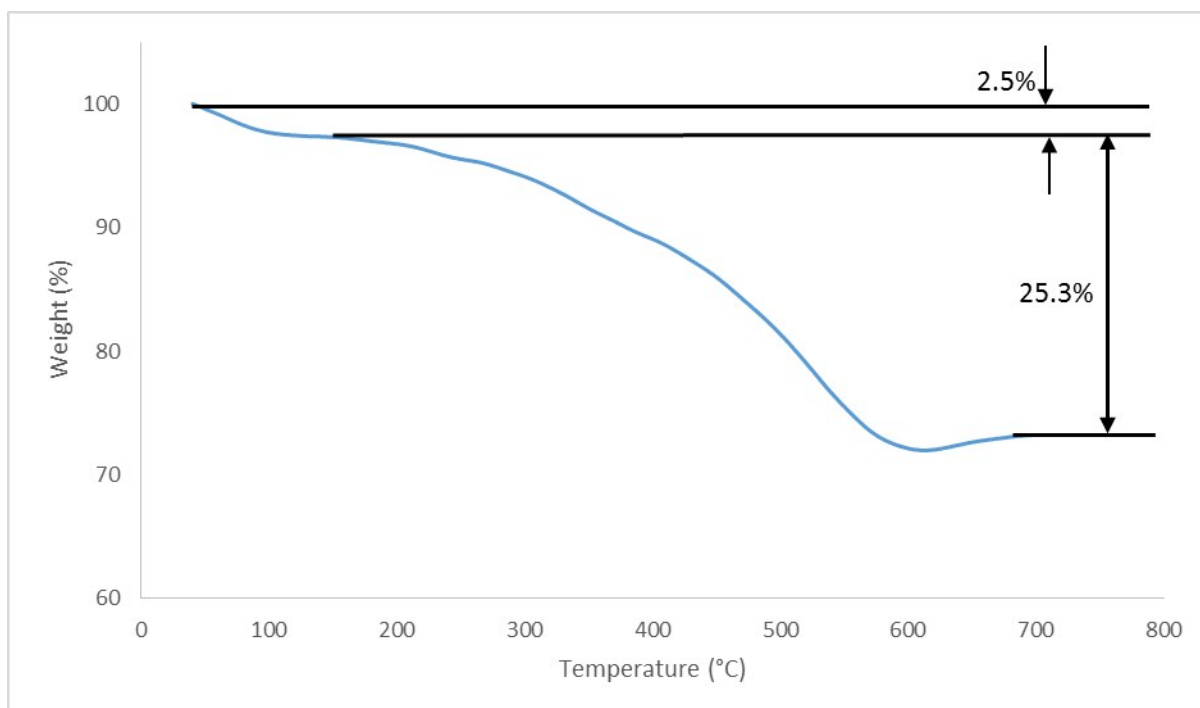

**Figure S4.** TGA curve of recycled Ag<sub>np</sub>-MCM-41 under air at a heating rate of 10 °C/min.

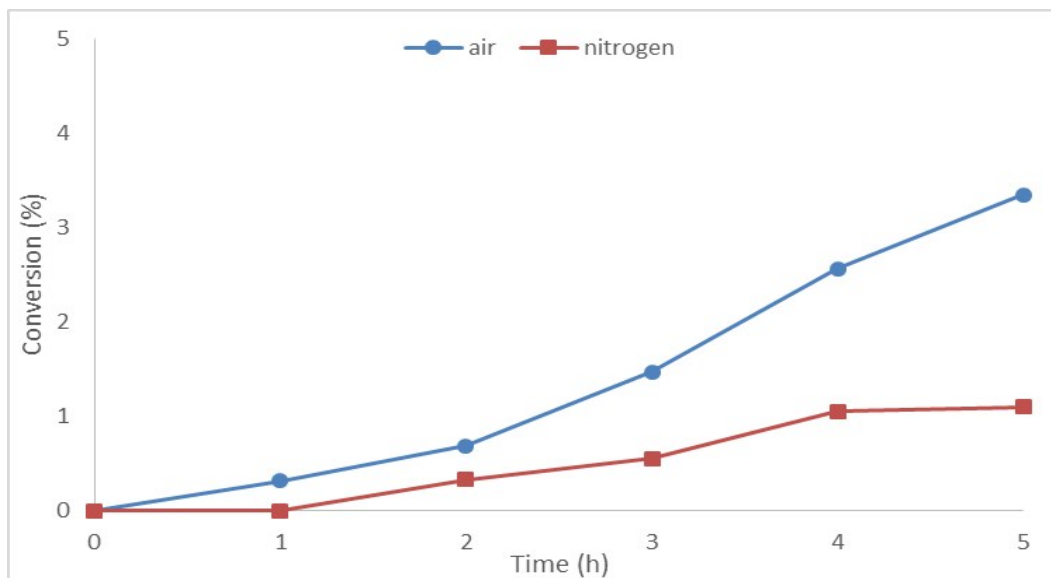

**Figure S5.** Comparison of  $\text{Ag}_{\text{np}}$ -MCM-41 catalyzed (Z)-cyclooctene epoxidation rate for the first 5h of reaction conducted under air and under nitrogen.

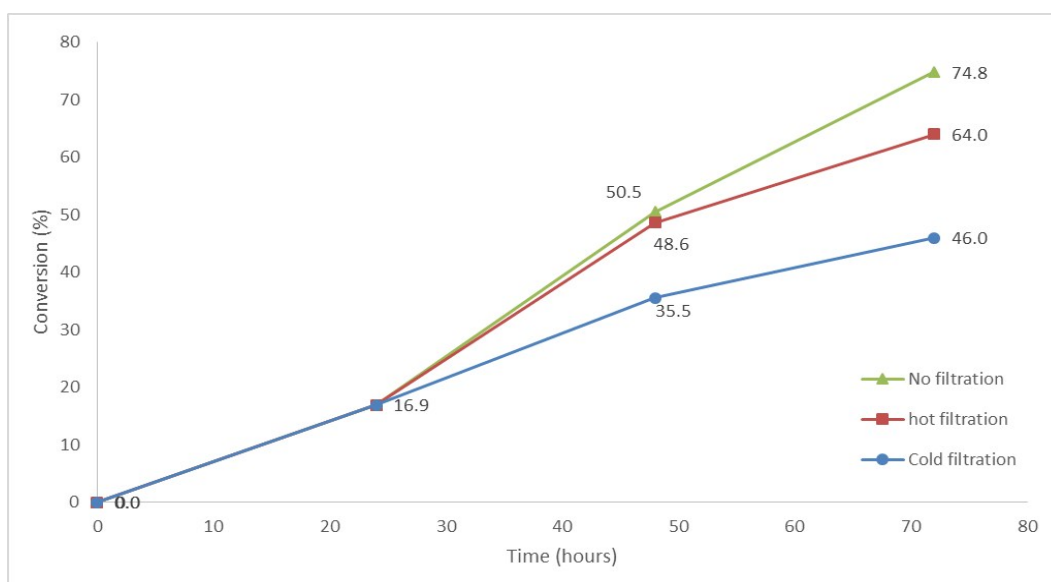

**Figure S6.** Comparison of (Z)-cyclooctene epoxidation rates for solutions that were hot filtered (80 °C) and cold filtered (room temperature) to remove solid  $\text{Ag}_{\text{np}}$ -MCM-41 after 24h of reaction, to the rate for a solution which was not filtered.
